# Supplementary material for: New particle formation leads to enhanced cloud condensation nuclei concentrations at Antarctic Peninsula
Source: Copernicus journal article supplement (doi:10.5194/egusphere-2023-707), 2023-05-02
Supplement: Supplementary file 1 [file egusphere-2023-707-supplement.pdf]

1 **New particle formation leads to enhanced**  
2 **cloud condensation nuclei concentrations at**  
3 **Antarctic Peninsula**

4  
5 Jiyeon Park<sup>1</sup>, Hyojin Kang<sup>1,2</sup>, Yeontae Gim<sup>1</sup>, Eunho Jang<sup>1,2</sup>, Ki-Tae Park<sup>1</sup>, Sangjong Park<sup>1</sup>, Chang Hoon  
6 Jung<sup>3</sup>, Darius Ceburnis<sup>4</sup>, Colin O'Dowd<sup>4</sup>, and Young Jun Yoon<sup>1,\*</sup>

7  
8 <sup>1</sup>Korea Polar Research Institute, 26 Songdomirae-ro, Yeonsu-gu, Incheon 21990, South Korea

9 <sup>2</sup>University of Science and Technology (UST), 217 Gajeong-ro, Yuseong-gu, Daejeon, Republic of Korea

10 <sup>3</sup>Department of Health Management, Kyungin Women's University, Incheon 21041, Republic of Korea

11 <sup>4</sup>School of Natural Sciences and Centre for Climate and Air Pollution Studies, Ryan Institute, University of Galway, Ireland

12 \*Correspondence to: Y.J. Yoon ([yjyoon@kopri.re.kr](mailto:yjyoon@kopri.re.kr))

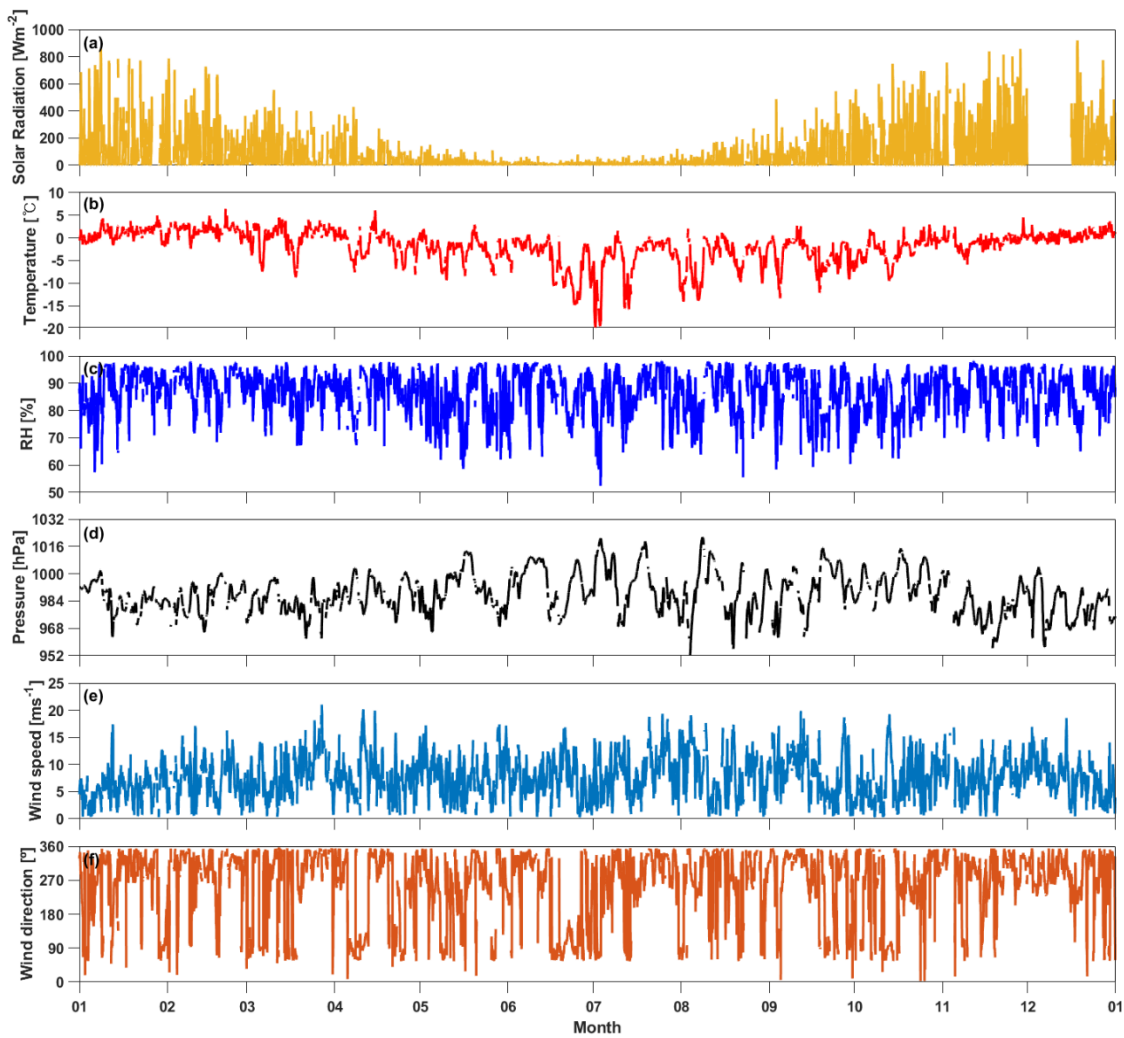

15  
 16 Figure S1. Time series of the 1 h average meteorological parameters: (a) solar radiation, (b) temperature,  
 17 (c) relative humidity, (e) air pressure, (f) wind speed, (g) wind direction, throughout the studied periods  
 18 (January 2018 – December 2018).

19

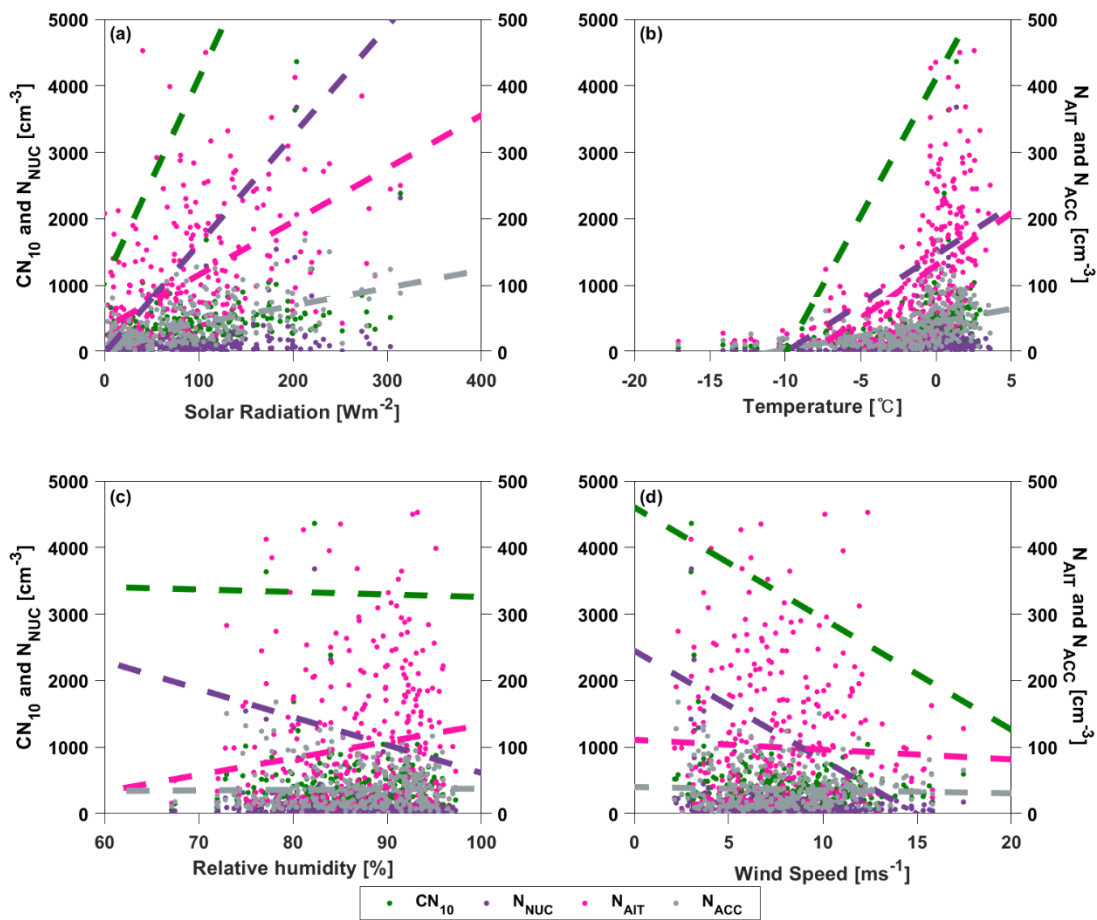

20

21 Figure S2. Relationships between size-segregated particle number concentrations and meteorological

22 parameters such as (a) solar radiation, (b) temperature, (c) relative humidity, (d) wind speed.

23

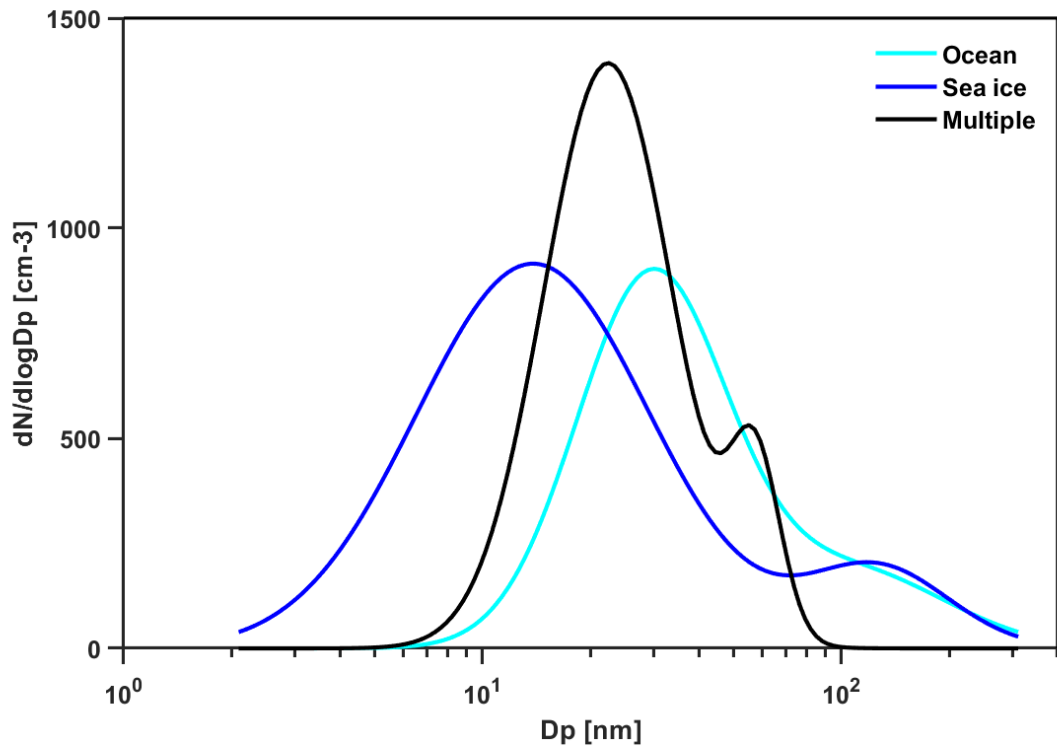

24

25 Figure S3. Average size distributions of aerosol particles ranging between 2.5 to 560 nm in diameter for  
26 ocean, sea ice, and multiple air masses.

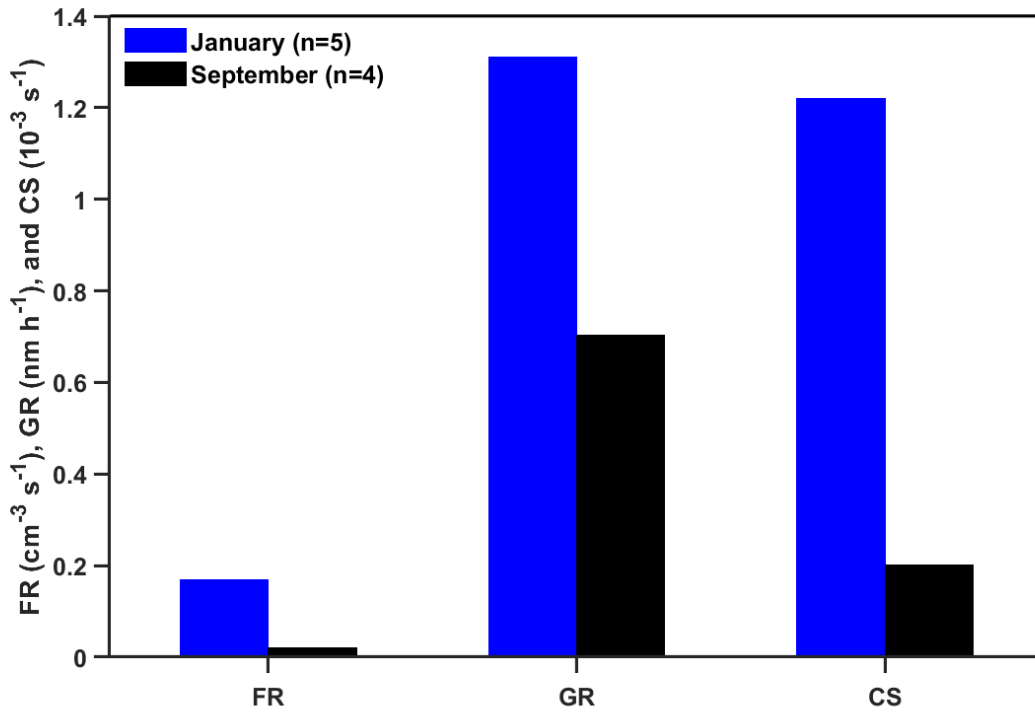

27

28

29 Figure S4. Comparison of mean values of formation rate (FR), growth rate (GR) and condensation sink

30 (CS) for Antarctic sea ice NPF cases observed between January and September.

31

32
